# Supplementary material for: Anions influence the extraction of rutile nanoparticles from synthetic and lake water
Source: Royal Society of Chemistry journal article supplement (doi:10.1039/c9ra02419k), 2019-01-01
Supplement: c9ra02419k1.pdf [file c9ra02419k1.pdf]

1

2

3

4

5 **Anions Influence the Extraction of Rutile Nanoparticles**

6 **from Synthetic and Lake Water**

7 **Supplementary Information**

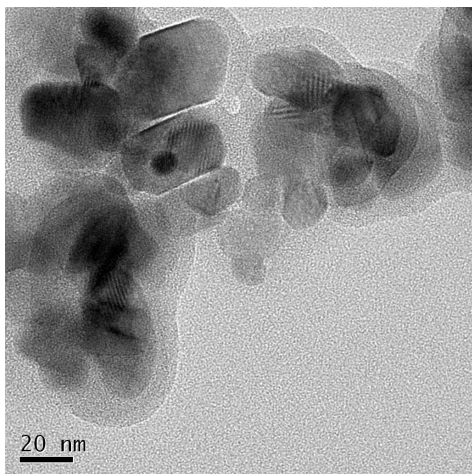

9

10

**Figure S1 Transmission electron micrograph of rutile NPs**

**Table S1. Parameters in the calculation of the DLVO energy barriers**

| Parameter    | Description                         | Value                  | Unit       |
|--------------|-------------------------------------|------------------------|------------|
| A            | Hamaker constant                    | $9.10 \times 10^{-20}$ | J          |
| C            | Electrolyte concentration           | 0.0001–0.1             | M          |
| IS           | Ionic strength                      | 0.0003–0.3             | M          |
| $k_B$        | Boltzmann constant                  | $1.38 \times 10^{-23}$ | J/K        |
| $k_B T$      |                                     | $4.12 \times 10^{-21}$ | J          |
| n            | Bulk electrolyte number             |                        | $m^{-3}$   |
|              | $n = NA \times c \times 10^3$       |                        |            |
| NA           | Avogadro's number                   | $6.02 \times 10^{23}$  | $mol^{-1}$ |
| c            | Molar concentration                 | 0.0001–0.1             | mol/L      |
| R            | radius of a particle                | $5.00 \times 10^{-8}$  | m          |
| T            | Temperature                         | 298                    | K          |
| z            | Valence of ions                     | 1–3                    |            |
| $\epsilon$   | Permittivity of water               | $7.08 \times 10^{-10}$ | F/m        |
| $\epsilon_0$ | Dielectric permittivity of a vacuum | $8.85 \times 10^{-12}$ | F/m        |
| $\epsilon_w$ | Dielectric constant of water        | 80                     | F/m        |
| $\kappa$     | Deby-Hückel Parameter               | $10^8 - 10^6$          | $m^{-1}$   |
| $\pi$        |                                     | 3.1416                 |            |
| $\zeta$      | Zeta potential                      | –50–50                 | mV         |
| e            | Elementary positive charge          | $1.60 \times 10^{-19}$ | C          |

15

**Table S2 Water parameter of the sampling lake**

| Parameters                           |               | Instrument/methods                |
|--------------------------------------|---------------|-----------------------------------|
| pH                                   | 7.42          | Portable Meter (Qiwei, CN)        |
| DOC (mg/L)                           | 7.68          | TOC-L analyzer (Shimadzu., Japan) |
| <b>Anion concentrations</b>          | <b>(mg/L)</b> |                                   |
| Cl <sup>-</sup>                      | 67.98         | GB/11893-1989                     |
| SO <sub>4</sub> <sup>2-</sup> (mg/L) | 60.65         | GB/11893-1989                     |
| PO <sub>4</sub> <sup>3-</sup>        | 0.09          | GB/11893-1989                     |
| HCO <sub>3</sub> <sup>-</sup>        | 42.01         | GB/11893-1989                     |
| <b>Cation concentrations</b>         | <b>(mg/L)</b> |                                   |
| K <sup>+</sup>                       | 4.32          | (ICP-AES)                         |
| Ca <sup>2+</sup>                     | 20.17         | (ICP-AES)                         |
| Mg <sup>2+</sup>                     | 25.26         | (ICP-AES)                         |
| Na <sup>+</sup>                      | 30.22         | (ICP-AES)                         |

16

17
